# Supplementary material for: Rap1 regulates hepatic stellate cell migration through the modulation of RhoA activity in response to TGF-β1
Source: PubMed Central journal article supplement — Int J Mol Med. 2019 May 30;44(2):491–502. doi: 10.3892/ijmm.2019.4215 (PMC6605627; doi:10.3892/ijmm.2019.4215), 2019-05-30

Figure S1. TGF- $\beta$ 1 regulates HSC-T6 cell migration via RhoA and NF- $\kappa$ B signaling. HSC-T6 cells were pretreated with 10  $\mu$ M Y27632, 1  $\mu$ g/ml Tat-C3 and 1  $\mu$ M BAY 11-7085. After 1h, the cells were incubated with 10 ng/ml TGF- $\beta$ 1 to the lower chamber. and the cells in the upper chamber were then allowed to migrate for 16 h. Cells that migrated to the lower chamber were fixed, stained and counted using microscopy. Each bar represents the mean  $\pm$  SEM of three independent experiments (n=3). \*\*\*P<0.001, one-way ANOVA, Tukey's post hoc test. TGF- $\beta$ 1, transforming growth factor- $\beta$ 1; CON, control; NF- $\kappa$ B, nuclear factor- $\kappa$ B.

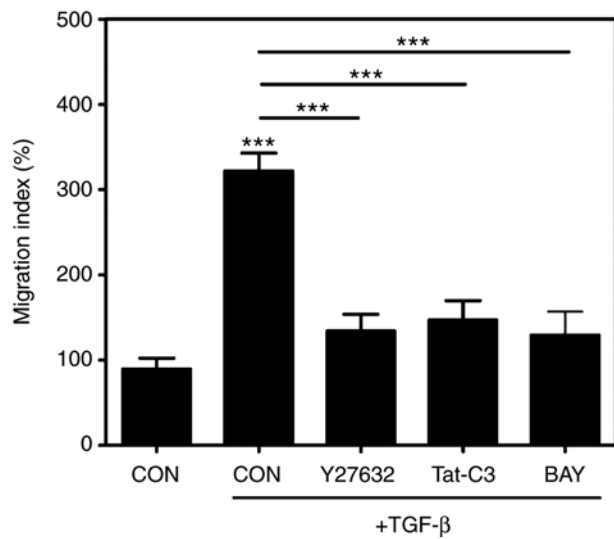

Supplement: Supplementary_Data.pdf [file Supplementary_Data.pdf]
